# Supplementary material for: Contact endoscopic surface vascular and epithelial morphology in leukoplakia and carcinoma of the vocal cords Contact endoscopy in leukoplakia and carcinoma of vocal cords
Source: Research Square preprint supplement (doi:10.21203/rs.3.rs-3106529/v1), 2023-06-27
Supplement: Supplementary file 1 [file 85f1f0a6c32e08c5188c45db.docx]

Table 1.
