# Supplementary figures and images for: Contact endoscopic surface vascular and epithelial morphology in leukoplakia and carcinoma of the vocal cords Contact endoscopy in leukoplakia and carcinoma of vocal cords
Source: Research Square preprint supplement (doi:10.21203/rs.3.rs-3106529/v1), 2023-06-27

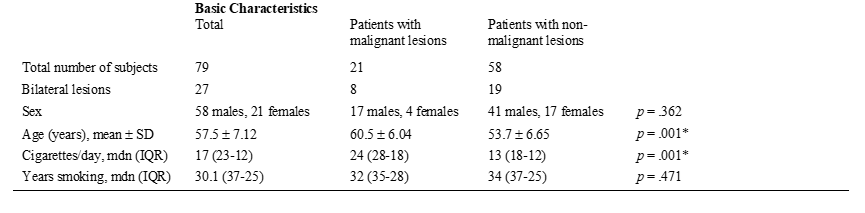


Table 2.

Supplement: Supplementary file 2 [file aaacd2f3b2e16b434644d5f0.docx]

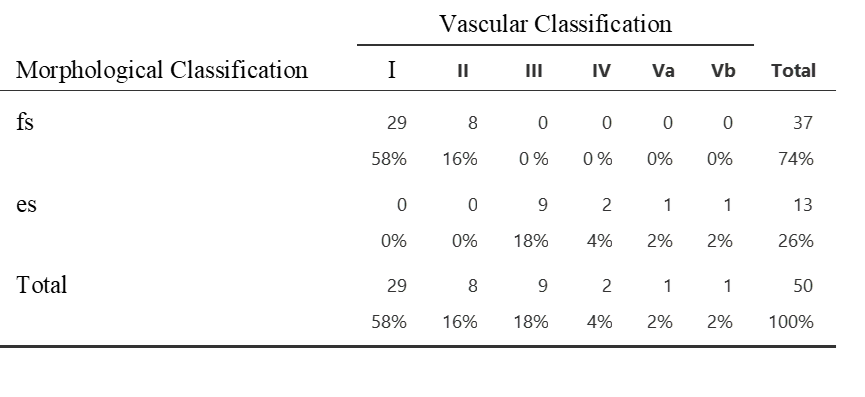


Table 4.

Supplement: Supplementary file 3 [file b0e8256b82892c2bbca71589.docx]
